DOES JUVENILE BALTIC STURGEON SMELL THE ENEMY?

1                    **Does juvenile Baltic sturgeon (*Acipenser oxyrinchus*) smell the enemy?**

2

3                    Maria Cámara Ruiz<sup>1</sup>, Carlos Espírito Santo<sup>1</sup>, Alfons Mai<sup>1</sup>, Jörn Gessner<sup>1</sup>, Sven Wuertz<sup>1</sup>

4

5

6                    <sup>1</sup> *Leibniz Institute of Freshwater Ecology and Inland Fisheries, Berlin, Germany*

7

8

9                    **Corresponding author:** M. Cámara Ruiz

10

11

12                    Email address: [ruiz@igb-berlin.de](mailto:ruiz@igb-berlin.de)

13

## SUMMARY

14  
15  
16  
17

18 Atlantic sturgeon (*Acipenser oxyrinchus*), also known as Baltic sturgeon, is considered extinct  
19 in German waters. Fish-rearing for conservation purposes still relies on classical hatchery  
20 technology producing fish not well suited for facing life in the wild, lacking behavioural skills  
21 such as foraging or anti-predation. Predation is hence a major source of mortality in newly  
22 stocked individuals. The aim of this study was to evaluate if naïve Baltic sturgeon juveniles  
23 were able to smell and recognize a common predator, sander (*Sander lucioperca*). Over a  
24 period of 30 days, three tanks from each group of Baltic sturgeon were attached to a rearing  
25 tank with sander (sander unit) and, as a control, carp (carp unit). Morphology of the dorsal  
26 scutes, distribution within the tank, stress (glucose, lactate and cortisol) and gene expression  
27 of brain plasticity and cognition were studied in comparison to the control group (carp unit).  
28 No significant differences were observed in any of the parameters measured. Thus, we  
29 conclude that naïve Baltic sturgeon is not able to innately recognize potential predators and  
30 future studies should focus on implementing predator odour together with chemical alarm  
31 substances.

32  
33

34 **Key words:** *Acipenser oxyrinchus*, *fitness*, *antipredator behaviour*, *conservation*  
35

36

## 37 **1. Introduction**

38 Sturgeons (Acipenseridae) have experienced a drastic decline due to several reasons including  
39 overfishing, habitat destruction and pollution over the last decades. Nowadays, sturgeons are  
40 among the most endangered fish species worldwide (IUCN, 2011). Baltic sturgeon (*Acipenser*  
41 *oxyrinchus*) has been indigenous to the Baltic region, but it is currently considered extinct  
42 (Gessner et al., 2006; Langhans et al., 2016). In order to recover Baltic sturgeon populations,  
43 restoration programs have been established to reestablish the species in its former distribution  
44 range by releases of juveniles with hatchery origin in an attempt to build up self-sustaining  
45 populations (Gessner et al., 2011).

46 Fish-rearing for conservation purposes still relies on classical aquaculture hatchery techniques  
47 that focus on growth, survival and reproduction within the hatchery, which are known to have  
48 shortcomings with regard to the behavioural skills needed in the wild (Ferno & Jarvi, 1998;  
49 Olla et al., 1998). One of the pitfalls of these methods is the high mortality of newly stocked  
50 individuals (Brown & Smith, 1998; Suboski & Templeton, 1989). In juvenile fishes, predation  
51 is a major source of the post-stocking mortality following release (Brown & Day, 2002;  
52 Brown & Laland, 2001).

53 Prey animals can determine risk by using a variety of visual, chemical and mechanical cues  
54 (lateral line). Regarding chemical cues, fishes heavily rely on chemosensory information,  
55 specifically semiochemicals. There are three classes of semiochemicals: kairomones,  
56 disturbance cues and damage-released alarm cues. Kairomones are cues emitted by one  
57 species and are detected by another, for instance, the scent of predators detected by prey.  
58 Kairomones are adaptively favourable to the receiver and help prey to detect and avoid  
59 potential predators (Ferrari et al., 2010).

60 The possibility of training captive-bred animals in predator avoidance prior release into the  
61 wild has received attention in the conservation context (Olla et al., 1994; Brown & Laland,  
62 2001; Griffin et al., 2000; Wallace, 2000). Exposure to various predator-stimuli prior to  
63 reintroductions has already been used with mammalian and avian prey (Griffin et al., 2000),  
64 but has received much less attention in fishes (Brown & Day, 2002). Antipredator behaviour  
65 is often assumed to be strongly defined by genetic components, but fishes can be very flexible  
66 in adjusting their responses (Kelley & Magurran, 2003). Studies have shown that the  
67 appropriate stimulus is able to improve the avoidance responses of fishes (Berejikian, 1995;  
68 Brown & Smith, 1998; Mirza & Chivers, 2000)

69 In this study, the objective is to determine if juvenile Baltic sturgeon is able to recognize a  
70 common predator, sander (*Sander lucioperca*) by smell. Therefore, sturgeon juveniles were

71 kept in the rearing water of sander for 30 days. Distribution within the tank, stress (glucose,  
72 lactate and cortisol), morphology of the dorsal scutes and gene expression of brain plasticity  
73 and cognition markers were studied in comparison to a control group that was reared in water  
74 used to rear carp (Fig. 1).

75

## 76 **2. Materials and Methods**

### 77 **2.1. Experimental design**

78 A total of 120 juvenile Baltic sturgeon, *Acipenser oxyrinchus*, ( $23.5 \pm 2$  cm;  $39.9 \pm 8.8$  g)  
79 were randomly distributed to 6 tanks (132 cm\* 62 cm\* 72 cm; V = 140 l). Three tanks of each  
80 group was attached to a rearing tank with sander (sander unit) or, as a control, carp (carp  
81 unit). The sander units were maintained in flow through with water of the municipal water  
82 supply, the carp rearing water was recirculated through a filter unit. The tanks were stocked at  
83  $4 \text{ kg/m}^3$  corresponding to 10 sander and 13 carp per tank (Fig. 1A). Water turnover was 540  
84 l/h and 509 l/h in the sander (T1) and carp tank (T2) respectively. In the sturgeon tanks, water  
85 turnover was  $172 \pm 7.2$  l/h. Fish were kept at a temperature of  $19.8 \pm 0.4$  under a natural  
86 photoperiod. Water parameters (T,  $\text{O}_2$  9.1 mg/L) were monitored daily, nitrite ( $< 0.05$  mg/L)  
87 and TAN ( $< 0.09$  mg/L) were determined every 3 days. All fish (sturgeon, sander and carp)  
88 were allowed to acclimate for two weeks prior to the start of the experiment.

### 89 **2.2. Sampling procedure**

90 Sturgeon juveniles were sampled after 30 days of experiment. Blood samples were collected  
91 from the caudal vein with a syringe. Serum was collected after centrifugation (10,000 rpm, 5  
92 min,  $4^\circ \text{C}$ ) and stored at  $-20^\circ \text{C}$  until use. Scute morphology was assessed by photographs.  
93 The increase in length of the protrusions was determined before and after the experiment with  
94 the ImageJ program (<https://imagej.nih.gov/ij/>). At the end of the experiment, the fish were  
95 killed by an overdose of MS222 and the brain was removed surgically. Sturgeon brains were  
96 dissected and divided into three parts representing the three main brain regions (forebrain,  
97 midbrain and hindbrain). Samples were stored in RNA later at  $-80^\circ \text{C}$  until gene expression  
98 analysis.

99 All experiments were in compliance with EU Directive 2010/63/EU and approved by the  
100 national authorities (G0305/15, Landesamt für Gesundheit und Soziales, Berlin, Germany).

### 101 **2.3. Tank distribution**

102 Distribution of sturgeon in the rearing tank was determined from 7 photos taken every 5 min  
103 at 1 day, 5 days, 10 days, 20 days and 30 days of the experimental trial. In order to assess the  
104 distribution, the tank was divided into 3 zones (up-, mid-, downstream section of the through).  
105 The juveniles recorded in each zone expressed as percentage of the total number of fish in the  
106 tank was recorded.

107

## 108 **2.4.Scute morphology**

109 To determine the morphology of the scutes, three scutes anterior to the dorsal fin were  
110 analyzed using ImageJ (<https://imagej.nih.gov/ij>). The measurements included diagonal  
111 (distance from the basis to the tip of the respective scute) and basal distance. The  
112 measurements were calibrated to a scale bar. All measurements were carried out in triplicate.

## 113 **2.5. Blood parameters (glucose, lactate and cortisol)**

114 For the determination of serum parameters, blood was sampled from the caudal vein with a  
115 heparinized syringe. After centrifugation at 5000 g for 5 min, cell-free plasma was  
116 immediately shock frozen and stored at -80 °C until further processing.

117 Glucose in the plasma of Baltic sturgeon was measured with a glucose colorimetric GOD-  
118 PAP kit (Greiner). In order to initiate the reaction, 5 µl of serum (1:5 dilution) from Baltic  
119 sturgeon were mixed with 250 µl of reagent. The mixture was incubated for 10 min at 25° C.  
120 Afterwards, the absorbance was measured at 500 nm and concentrations were calculated from  
121 a dilution series (0.0625-1 mg/ml).

122 Plasma lactate in the serum of Baltic sturgeon was measured with a lactate colorimetric LOD-  
123 PAP kit (Greiner). In brief, 5 µl of serum (1:2 dilution) from Baltic sturgeon was mixed with  
124 250 µl of reagent. The mixture was incubated for 10 min at 25° C. Afterwards, the absorbance  
125 was measured at 500 nm and concentrations were calculated from a dilution series (0.0375-  
126 0.3 mg/ml).

127

128 Cortisol was determined using an ELISA kit (IBL, Germany). In brief, 100 µL plasma was  
129 extracted by vigorously shaking for 3 min with 1.9 mL ethanol in 5 mL glass vials. The  
130 organic phase was transferred to a new vial and the extraction was consecutively repeated  
131 twice as described above. The three fractions were pooled and allowed to evaporate under a  
132 constant nitrogen stream. For analysis, the remaining steroid fraction was redissolved in assay  
133 buffer (IBL, Germany). Cortisol concentrations were determined in duplicate at 450 nm with  
134 an Infinite M200 microplate reader (Tecan, Germany) and calculated from a standard dilution  
135 series.

## 136 **2.6. Gene expression**

137 Total RNA was extracted with TRIzol as described by Reiser et al., (2011), including a  
138 DNase I digestion. Total RNA concentration and purity were determined in duplicates with a  
139 Nanodrop® ND-1000 UV–Vis spectrophotometer. Purity was validated by the ratio of the  
140 absorbance at 260 and 280 nm (A<sub>260</sub>/A<sub>280</sub>) ranging between 1.8 to 2.0. Moreover, integrity of  
141 the total RNA was checked by gel electrophoresis and, in 10% of all samples, on a RNA 6000  
142 Nano chip with an Agilent 2100 Bioanalyzer. To eliminate potential DNA contamination,  
143 DNase I digestion was performed in all samples prior to transcription. Next, mRNA was  
144 transcribed with MMLV Affinity reverse transcriptase (Agilent, 200 Units/μl) according to  
145 the manufacturer's instruction. In 10% of the samples, the enzyme was substituted by pure  
146 H<sub>2</sub>O, serving as a control (-RT) to monitor DNA contamination.

147 Species-specific primers targeting elongation factor 1α (*ef1a*), brain-derived neurotrophic  
148 factor (*bdnf*), neurogenic differentiation factor (*neurod1*) and proliferating cell nuclear antigen  
149 (*pcna*) were designed using the sequence information available. Specificity of the assays was  
150 confirmed by direct sequencing (SeqLab, Germany). Real-time PCR was carried out with  
151 Mx3005p qPCR Cyclers (Stratagene), monitoring specificity by melting curve analysis.

152 For the PCR reaction, 2 μL of the diluted samples (40 ng/μL) were used as template in 20 μL  
153 PCR mix [SYBR-Green I (Invitrogen), 200 μM of each dNTPs (Qbiogene), 3 mM MgCl<sub>2</sub>  
154 and 1 U Invitrogen Platinum Taq polymerase]. PCR conditions comprised an initial  
155 denaturation at 96 °C for 3 min, followed by 40 cycles of denaturation at 96 °C for 30 s,  
156 primer annealing (for Ta, see Table 1) for 30 s and elongation at 72 °C for 30 s. PCR  
157 efficiencies were determined experimentally with a dilution series of a calibrator  
158 corresponding to 200 ng/μl. PCR assays for all individual samples were run in duplicate.  
159 Expression of target genes were calculated by the comparative CT method (ΔΔCT) according  
160 to (Pfaffl, 2001), correcting for the assay efficiencies and normalizing to *ef1a* as a  
161 housekeeping gene. Expression data are presented as fold increase of the respective calibrator.

## 162 **2.7. Data analysis and statistical methods**

163 Data are presented as mean ± standard deviation (SD). Prior to statistical analyses, all data  
164 were tested for normality of distribution using the Kolmogorov-Smirnov/ Shapiro Wilk test  
165 and for homogeneity using Levene's test. Data on the behavior were scored and analyzed  
166 using Dunn's multiple comparison test. RNA expression, lactate, glucose and cortisol were  
167 analysed with a parametric student T-test or non-parametric Mann-Whitney test. The level of

168 significance used was  $P \leq 0.05$ . All statistical analyses were performed with GraphPad Prism

169 statistical program.

170



171 **3. Results**

172 **3.1. Tank distribution**

173 The distribution of the fish in the tanks did not reveal significant differences for the  
174 percentage of Baltic sturgeon recorded in each zone (Fig 2) over time. Approximately, 25-  
175 35% of sturgeon stayed in each of the three zones regardless of the source of the inflow water.  
176 No significant differences were observed between dates or treatment observed (Dunn's,  $P \leq$   
177 0.05).

178 **3.2. Scute morphology**

179 Diagonal and basis length of the scutes were correlated (Fig 3). There were no significant  
180 differences of the coefficient between the sander and the carp group observed.

181 **3.3. Glucose, lactate and cortisol activities**

182 No significant differences were observed in glucose, lactate or cortisol concentrations in the  
183 serum of Baltic sturgeon at the end of the experimental trial (Fig 4). Cortisol concentrations  
184 did not reflect any differences between treatments groups.

185 **3.4. Brain plasticity and cognition**

186 Selected genes related to brain plasticity and cognition (*neurod1*, *bdnf*, *pcna*) were analyzed  
187 in all three brain areas of Baltic sturgeon at the end of the rearing trial. No significant  
188 differences were observed in the respective genes for any of the three brain regions (forebrain,  
189 midbrain, hindbrain) of Baltic sturgeon (Fig 5).

190

191

## 192 **Discussion**

193 Stocking programs routinely release hatchery-reared fish into their natural habitat in an  
194 attempt to restore or maintain stable populations. One of the pitfalls of these stocking  
195 programs is the elevated mortality of newly stocked individuals (Brown & Smith, 1998;  
196 Suboski & Templeton, 1989), which in most cases is highest during and immediately after  
197 release (Olla et al.,1994). Unfortunately, methods for reducing post-release mortality have not  
198 kept the same pace as aquaculture technology. In general, conservationists have major  
199 concerns regarding early life experiences in artificial environments and their impact upon the  
200 resulting lack of fitness for survival (Johnsson et al., 2014).

201 When hatchery-reared fish are released into the wild, they are immediately placed in a novel  
202 and variable environment and are also exposed to predatory risk, which they do not  
203 experience during the hatchery period. Most mortality during and right after release is due to  
204 predation (Brown & Day, 2002) Conservation managers should focus on improving fish  
205 survival through reducing mortality for the periods during and immediately following release  
206 (Sproul & Tominaga, 1992), which will help in closing the gap between wild and hatchery-  
207 reared fish. The differences might be overcome by enriching the environment in which the  
208 fish are reared. Furthermore, there is growing evidence that antipredator behaviour is highly  
209 sensitive to artificial rearing (Berejikian, 1995). This process should include anti-predator and  
210 foraging training before releasing the fish into the wild.

211 As with other behavior, anti-predator responses have both inherent and learned components.  
212 However, most behavior patterns should be viewed as a combination of these two (Kieffer &  
213 Colgan, 1992). Learned recognition of novel predators could potentially increase individual's  
214 survival during later predator encounters (Gazdewich & Chivers, 2002; Mirza & Chivers,  
215 2000). Furthermore, several studies have shown that prey reduce their vulnerability to  
216 predation by changing morphology, life history strategy and/or behavior when exposed to  
217 substances emitted by a predator (Brönmark & Hansson, 2000).

218 In this study, the objective was to determine if Baltic sturgeon (*A. oxyrinchus*) was able to  
219 innately (inherent component) recognize the smell of a common predator, sander (*Sander*  
220 *luciperca*). In the experiments, there was no indication of differences in the morphology of  
221 the dorsal scutes, uneven distribution within the tank, stress levels (glucose, lactate and  
222 cortisol) or gene expression of brain plasticity. Thus, we conclude that there was no indication  
223 that Baltic sturgeon was chronically stressed during the experimental trial.

224 Several options should be considered as underlying causes to contributing to this result. First,  
225 the fish might not be able to differentiate the smell of the two species when naïve. Second, at

226 the size of the fish tested, carps could be considered a potential predator too. For the behavior  
227 observations, the time span between introducing the fish and recording their response has  
228 already allowed acclimation. The same reason holds true for the blood stress parameters. In  
229 contrast to these hypothetical explanations, the results for the plasticity of the brain regions  
230 provide clear evidence that either the control was not functional or that the smell recognition  
231 is not effective in naïve fish.

232 In conclusion, these results suggest that in order to raise Baltic sturgeon with the necessary  
233 anti-predator behavior to survive in the wild, it would be necessary to undergo a more  
234 complex training period. Only the exposure to predator smell is not sufficient to stimulate  
235 anti-predator behavior. In future trials, the training period should consist in implementing  
236 pairing predator odour with conspecifics alarm substances. This would be mostly appropriate  
237 as it seems that Baltic sturgeon lack anti-predator inherent components. Also, the type of  
238 predator exposure could impact antipredator behavior learning. For example, instead of a  
239 continuous exposure (ongoing stress), the exposure of Baltic sturgeon to potential predators  
240 could take place only intermittently to avoid habituation. It might be needed to be taken into  
241 account that as sturgeon develop morphological defenses, such as the growth of pointed bony  
242 scutes, they may rely less upon antipredator behavior to prevent being utilized as prey. If  
243 morphological or chemical defenses of prey are effective defense mechanisms, it is possible  
244 that other behavioral responses may appear to be weak (DeWitt & Langerhans, 2003).

245

246 **Acknowledgments**

247 The authors thank Eva Kreuz for her contribution in the laboratory. The study was supported  
248 by the European Training Network of the Marie Skłodowska-Curie Actions ITN “Improved  
249 production strategies of endangered freshwater species”. This project has received funding  
250 from the European Union’s Horizon 2020 research and innovation program under the Marie  
251 Skłodowska-Curie grant No [642893].

252

253 **Competing Interests**

254 I declare that there are no competing interests.

255 **Author contributions**

256 The experiment was conducted by A.M. and C.E.S.. The laboratory analysis was carried out  
257 by M.C.R. M.C.R. wrote the first draft of the manuscript. S.W. supervised the project. The  
258 manuscript was revised by all co-authors.

259

260 **References**

- 261 Berejikian, B.A. (1995). The effects of hatchery and wild ancestry and experience on the  
262 relative ability of steelhead trout fry (*Oncorhynchus mykiss*) to avoid a benthic predator.  
263 *Canadian Journal of Fisheries and Aquatic Sciences*, 52, 2476–2482.
- 264 Brönmark, C., & Hansson, L.A. (2000). Chemical communication in aquatic systems: An  
265 introduction. *Oikos*, 88, 103–109. <https://doi.org/10.1034/j.1600-0706.2000.880112>
- 266 Brown, C., Day, R.L. (2002). The future of stock enhancements: Lessons for hatchery  
267 practice from conservation biology. *Fish and Fisheries*, 3, 79–94.  
268 <https://doi.org/10.1046/j.1467-2979.2002.00077>
- 269 Brown, C., & Laland, K. (2001). Social learning and life skills training for hatchery reared  
270 fish. *Journal of Fish Biology*, 59, 471–493. <https://doi.org/10.1006/jfbi.2001.1689>
- 271 Brown, G.E., & Smith, R.J.F. (1998). Acquired predator recognition in juvenile rainbow trout  
272 (*Oncorhynchus mykiss*): conditioning hatchery-reared fish to recognize chemical cues of  
273 a predator. *Canadian Journal of Fisheries and Aquatic Sciences*, 55, 611–617.  
274 <https://doi.org/10.1139/f97-261>
- 275 DeWitt, T.J., & Langerhans, R.B. (2003). Multiple prey traits, multiple predators: Keys to  
276 understanding complex community dynamics. *Journal of Sea Research*, 49, 143–155.  
277 [https://doi.org/10.1016/S1385-1101\(02\)00220-4](https://doi.org/10.1016/S1385-1101(02)00220-4)
- 278 Ferno, A., & Jarvi, T. (1998). Domestication genetically alters the antipredator behaviour of  
279 anadromous brown trout (*Salmo trutta*)- dummy predator experiment. *Nordic Journal of*  
280 *Freshwater Research*, 74, 95–100.
- 281 Ferrari, M.C.O., Wisenden, B.D., & Chivers, D.P. (2010). Chemical ecology of predator–prey  
282 interactions in aquatic ecosystems: a review and prospectus.. *Canadian Journal of*  
283 *Zoology*, 88, 698–724. <https://doi.org/10.1139/Z10-029>
- 284 Gazdewich, K.J., & Chivers, D.P. (2002). Acquired predator recognition by fathead minnows:  
285 Influence of habitat characteristics on survival. *Journal of Chemical Ecology*, 28, 439–  
286 445.
- 287 Gessner, J., Arndt, G.M., Tiedemann, R., Bartel, R., & Kirschbaum, F. (2006). Remediation  
288 measures for the Baltic sturgeon: Status review and perspectives. *Journal of Applied*  
289 *Ichthyology*, 22, 23–31. <https://doi.org/10.1111/j.1439-0426.2007.00925>

- 290 Gessner, J., Tautenhahn, M., Spratte, S., Arndt, G.M., & von Nordheim, H. (2011).  
291 Development of a German Action Plan for the restoration of the European sturgeon  
292 *Acipenser sturio* L. - implementing international commitments on a national scale.  
293 *Journal of Applied Ichthyology*, 27, 192–198. <https://doi.org/10.1111/j.1439->  
294 0426.2011.01697
- 295 Griffin, A.S., Blumstein, D.T., & Evans, C.S. (2000). Training captive-bred or translocated  
296 animals to avoid predators. *Conservation Biology*, 14, 1317–1326.  
297 <https://doi.org/10.1046/j.1523-1739.2000.99326>
- 298 IUCN (2018). The IUCN Red List of Threatened Species. Version 2018-1. Johnsson, J.I., &  
299 Abrahams, M.V. (1991). Interbreeding with domestic strain increases foraging under  
300 threat of predation in juvenile steelhead trout (*Oncorhynchus mykiss*): An experimental  
301 study. *Canadian Journal of Fisheries and Aquatic Sciences*, 48, 243–247.  
302 <https://doi.org/https://doi.org/10.1139/f91-033>
- 303 Johnsson, J.I., Brockmark, S., & Näslund, J. (2014). Environmental effects on behavioural  
304 development consequences for fitness of captive-reared fishes in the wild. *Journal of*  
305 *Fish Biology*, 85, 1946–1971. <https://doi.org/10.1111/jfb.12547>
- 306 Kelley, J.L., & Magurran, A.E. (2003). Learned predator recognition and antipredator  
307 responses in fishes. *Fish and Fisheries*, 4, 216–226. <https://doi.org/10.1046/j.1467->  
308 2979.2003.00126
- 309 Kieffer, J.D. & Colgan, P. (1992). The role of learning in fish behavior. *Reviews in Fish*  
310 *Biology and Fisheries*, 2, 125–43.
- 311 Langhans, S.D., Gessner, J., Hermoso, V., & Wolter, C. (2016). Coupling systematic planning  
312 and expert judgement enhances the efficiency of river restoration. *Science of the Total*  
313 *Environment*, 560–561, 266–273. <https://doi.org/10.1016/j.scitotenv.2016.03.232>
- 314 Mirza, R.S., & Chivers, D.P. (2000). Predator-recognition training enhances survival of brook  
315 trout: evidence from laboratory and field-enclosure studies. *Canadian Journal of*  
316 *Zoology*, 78, 2198–2208. <https://doi.org/10.1139/z00-164>
- 317 Olla, B.L., Davis, M.W., & Ryer, C.H. (1998). Understanding how the hatchery environment  
318 represses or promotes the development of behavioral survival skills. *Bulletin of Marine*  
319 *Sciences*, 62, 531–550.

- 320 Olla, B.L., Davis, M.W. & Ryer, C.H. (1994). Behavioural deficits in hatchery-reared fish:  
321 Potential effects on survival following release. *Aquaculture and Fisheries Management*,  
322 25, 19–34.
- 323 Pfaffl, M.W. (2001). A new mathematical model for relative quantification in real-time RT-  
324 PCR. *Nucleic Acids Research*, 29, 45.
- 325 Reiser, S., Wuertz, S., Schroeder, J.P., Kloas, W., Hanel, R. (2011). Risks of seawater  
326 ozonation in recirculation aquaculture - Effects of oxidative stress on animal welfare of  
327 juvenile turbot (*Psetta maxima*, L.). *Aquatic Toxicology*, 105, 508–517.  
328 <https://doi.org/10.1016/j.aquatox.2011.08.004>
- 329 Sproul, T., & Tominaga, O. (1992). An economic review of the Japanese flounder stock  
330 enhancement project in Ishikary Bay. *Bulletin of Marine Science*, 50, 75–88.
- 331 Suboski, M.D., & Templeton, J.J. (1989). Life skills training for hatchery fish: Social learning  
332 and survival. *Fisheries Research*, 7, 343–352. [https://doi.org/10.1016/0165-](https://doi.org/10.1016/0165-7836(89)90066-0)  
333 [7836\(89\)90066-0](https://doi.org/10.1016/0165-7836(89)90066-0)
- 334 Wallace, M.P.(2000). Retaining natural behavior in captivity for reintroduction programmes,  
335 In *Behaviour and Conservation* (eds L.M. Gosling and W.J. Sutherland). Cambridge  
336 University Press, Cambridge, pp. 300-314-
- 337
- 338
- 339

340 **Tables**

341 **Table 1.** Specifications of qPCR assays including primer sequences, annealing temperature  
342 (Ta), amplicon length [bp], PCR efficiency (Eff) and NCBI accession number of the  
343 respective housekeeping (ef) and target genes: ef- elongation factor 1 a, neurod1- neurogenic  
344 differentiator factor, bdnf - brain-derived neurotrophic factor, pcna- proliferating cell nuclear  
345 antigen-

| gene          | primer | 5'-3' sequence       | Ta [°C] | length [bp] | Eff. <sup>1</sup> [%] | GeneBank # |
|---------------|--------|----------------------|---------|-------------|-----------------------|------------|
| <i>efa</i>    | f      | TCAgggAgAAgATTgACCGT | 65      | 239         | 97                    |            |
|               | r      | AgACTTggTgACTTTgCCTg |         |             |                       |            |
| <i>neuroD</i> | f      | TATCATCCCCCTggTCTgCC | 65      | 175         | 98                    |            |
|               | r      | CATTAACgCTCAgTggTggg |         |             |                       |            |
| <i>pcna</i>   | f      | gAAgAAggTTTTggAggCg  | 65      | 187         | 92.5                  |            |
|               | r      | CCTgCTCAgATTgACCCC   |         |             |                       |            |
| <i>bdnf</i>   | f      | gACggCCgTAgACAAGAAgA | 65      | 188         | 84.5                  |            |
|               | r      | TggTCCgACACTgTgAATTg |         |             |                       |            |

<sup>1</sup>Efficiency was determined from serial dilution series

346

347

348

349



350 **Figure legends**

351 **Figure 1.** Experimental design. 1A. Three tanks from each group were attached to a rearing  
352 tank with sander (sander unit) or, as a control, carp (carp unit). 1B. Tank distribution.  
353 Different zones were established in order to observe the distribution towards the inlet.

354 **Figure 2. Tank distribution.** Percentage of Baltic sturgeon (*A. oxyrinchus*) in each zone of  
355 rearing troughs during the exposition to water from Sander (left) or carp (right) rearing  
356 systems. No significant differences over time (Dunn's,  $p \leq 0.05$ ) or between treatments  
357 (Mann-Whitney test,  $p \leq 0.05$ ) were observed.

358 **Figure 3.** Comparison of the dorsal scutes dimensions (b-basis, d – diagonal) from juvenile  
359 Baltic sturgeon *A. oxyrinchus* kept in the rearing water of sander or, as a control, carp for 30  
360 days.

361 **Figure 4.** Glucose, lactate and cortisol in the plasma s of juvenile Baltic sturgeon *A.*  
362 *oxyrinchus* kept in the rearing water of sander or, as a control, carp for 30 days. No significant  
363 differences between treatments were observed (Mann-Whitney test,  $p \leq 0.05$ ).

364 **Figure 5.** Gene expression of neuroplasticity markers (*bdnf*, *neuroD1*, *pcna*) in the fore-, mid  
365 and hindbrain of juvenile Baltic sturgeon *A. oxyrinchus* kept in the rearing water of sander or,  
366 as a control, carp for 30 days. No significant differences between treatments were observed  
367 (Mann-Whitney test,  $p \leq 0.05$ ). Data are expressed as fold relative. *bdnf* - brain-derived  
368 neurotrophic factor (*bdnf*), *neurod1* - neurogenic differentiation factor, *pcna* - proliferating  
369 cell nuclear antigen (*pcna*).

370

**Figures**

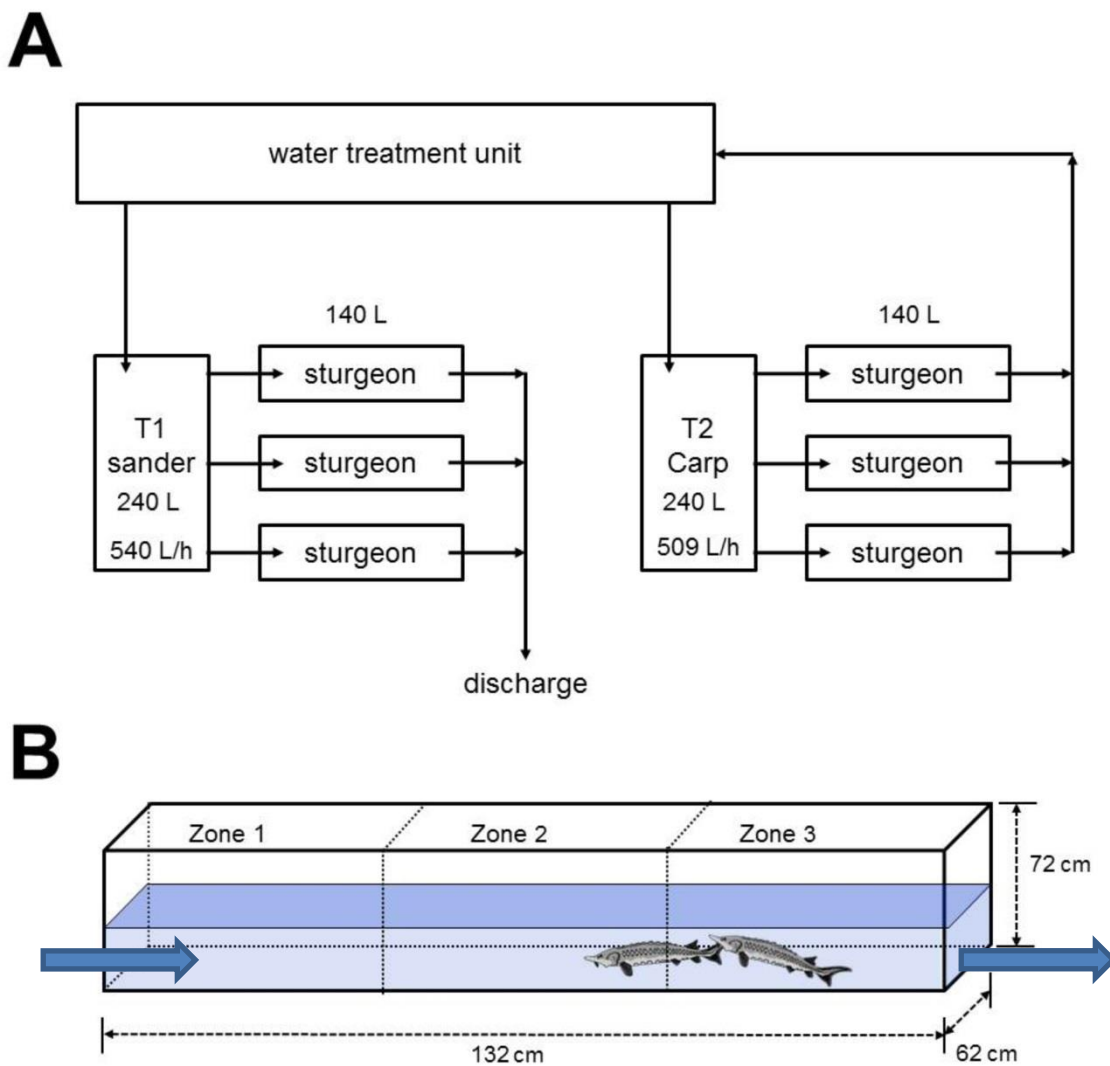

**Figure 1. Experimental design. 1A.** Three tanks from each group were attached to a rearing tank with sander (sander unit) or, as a control, carp (carp unit). **1B. Tank distribution.** Different zones were established in order to observe the distribution towards the inlet.

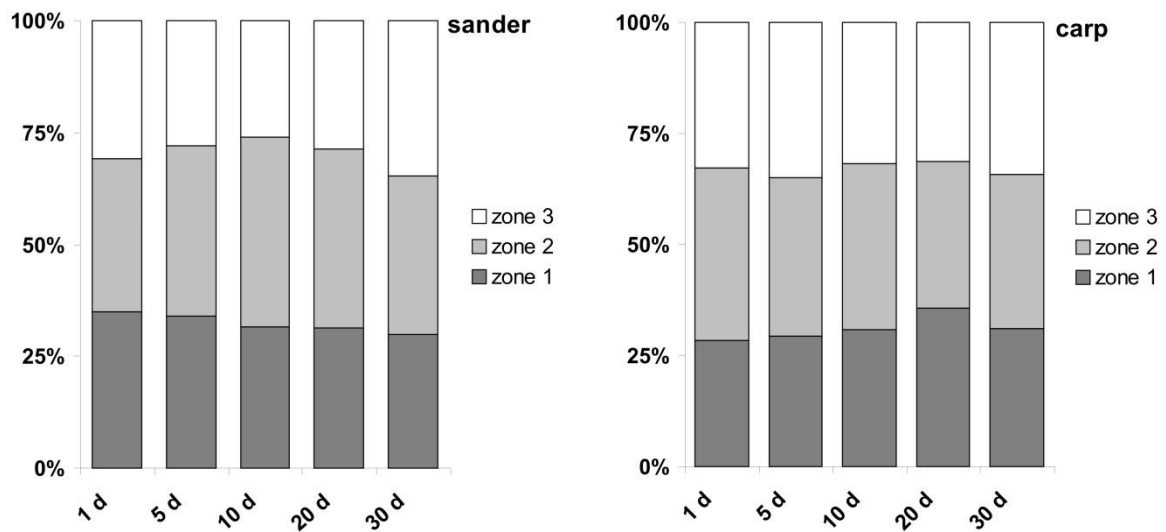

**Figure 2. Tank distribution.** Percentage of Baltic sturgeon (*A. oxyrinchus*) in each zone of rearing troughs during the exposition to water from Sander (left) or carp (right) rearing systems. No significant differences over time (Dunn's,  $p \leq 0.05$ ) or between treatments (Mann-Whitney test,  $p \leq 0.05$ ) were observed.

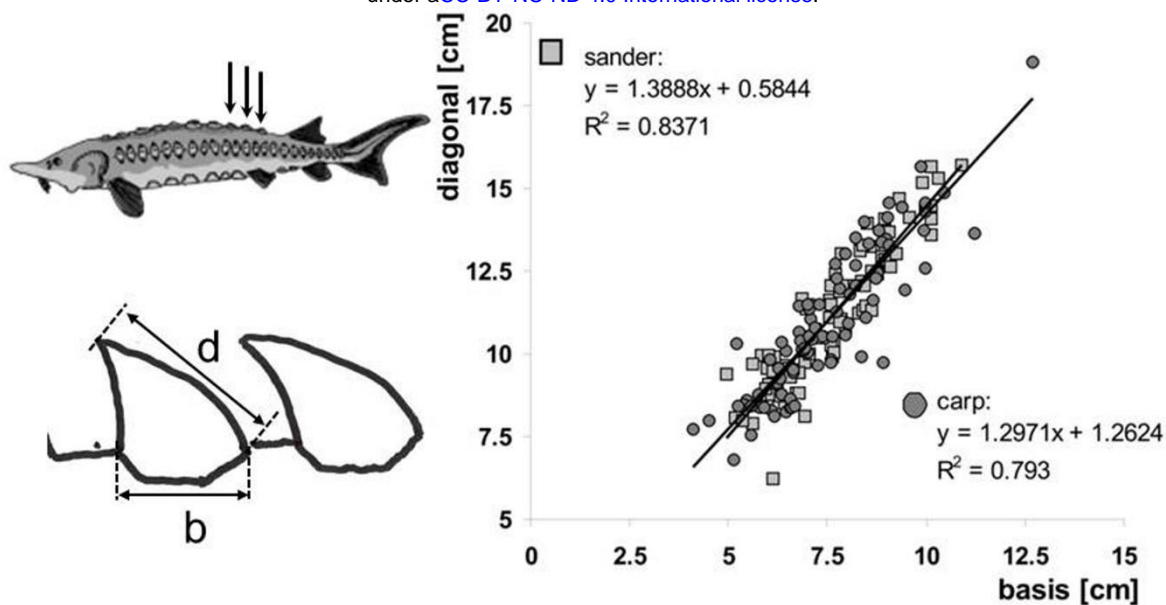

**Figure 3.** Comparison of the dorsal scutes dimensions (b-basis, d – diagonal) from juvenile Baltic sturgeon *A. oxyrinchus* kept in the rearing water of sander or, as a control, carp for 30 days.

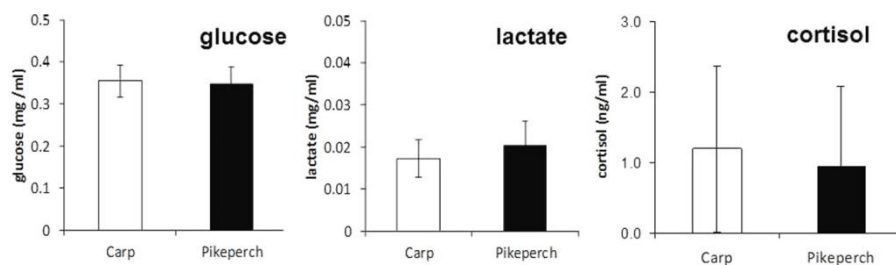

**Figure 4.** Glucose, lactate and cortisol in the plasma of juvenile Baltic sturgeon *A. oxyrinchus* kept in the rearing water of sander or, as a control, carp for 30 days. No significant differences between treatments were observed (Mann-Whitney test,  $p \leq 0.05$ ).

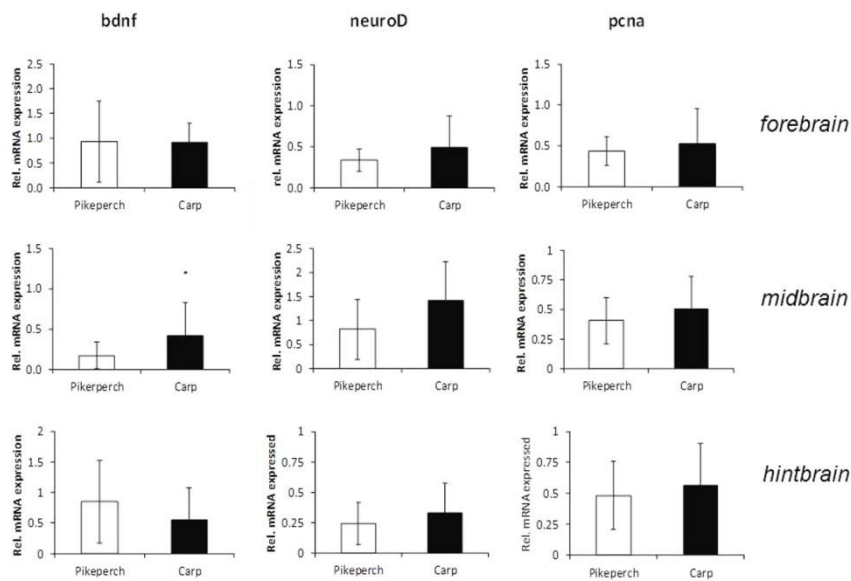

**Figure 5.** Gene expression of neuroplasticity markers (bdnf, neuroD1, pcna) in the fore-, mid and hindbrain of juvenile Baltic sturgeon *A. oxyrinchus* kept in the rearing water of sander or, as a control, carp for 30 days. No significant differences between treatments were observed (Mann-Whitney test,  $p \leq 0.05$ ). Data are expressed as fold relative. bdnf - brain-derived neurotrophic factor (*bdnf*), neurod1 - neurogenic differentiation factor, pcna - proliferating cell nuclear antigen (*pcna*).
